# Supplementary material for: Interfering With Hyaluronic Acid Metabolism Suppresses Glioma Cell Proliferation by Regulating Autophagy
Source: Research Square preprint supplement (doi:10.21203/rs.3.rs-88666/v1), 2020-10-09
Supplement: Supplementary file 1 [file 730e94ee848d739434534388.docx]

**TableI.** Sequence of siRNA, prismer and lentivirus.

siRNA sequence

siNC 5′GUA UGA CAA CAG CCU CAA GTT3′

HAS3-siRNA1 5′CAU CAG AAG UUC CUA GGC ATT3′

HAS3-siRNA2 5′GGC UAC CGA ACU AAG UAU ATT3′

HAS3-siRNA3 5′CUA UAC UGU AUG GCU GCU ATT3′

CD44-siRNA1 5′ GGA CCA AUU ACC AUA ACU ATT3′

CD44-siRNA2 5′CUC CCA GUA UGA CAC AUA UTT3′

CD44-siRNA3 5′GCA GUC AAC AGU CGA AGA ATT3′

Prismer sequence

GAPDH F-5′ CACCCACTCCTCCACCTTTGA3′, R-5′ACCACCCTGTTGCTGTAGCCA3′

HAS3 F-5’TTACTTCCGGGAGTGGCTCTACAAC3’, R-5’CGTCAGCAGGAAGAGGAGAATG3’

CD44 F- 5’TGGAAGATTTGGACAGGACAG3’,R-5’CGTGTGTGGGTAATGAGAGGTA3’

Lentivirus sequences

LV-shNC 5′GUA UGA CAA CAG CCU CAA GTT3′

LV-shHAS3 5′GGC UAC CGA ACU AAG UAU ATT3′

LV-shCD44 5′GGA CCA AUU ACC AUA ACU ATT 3′
